# Supplementary material for: The Roles of Gene Duplication, Gene Conversion and Positive Selection in Rodent Esp and Mup Pheromone Gene Families with Comparison to the Abp Family
Source: PLoS One. 2012 Oct 19;7(10):e47697. doi: 10.1371/journal.pone.0047697 (PMC3477143; doi:10.1371/journal.pone.0047697)
Supplement: Dataset S3 — Inner fragments of mouse Esp introns b from GENECONV analysis. (XLSX) [file pone.0047697.s006.xlsx]

## Sheet: Sheet1
Dataset S3. Inner fragments of mouse Esp intron b from GENECONV analysis
gscale = 0
#	Seq	Sim	BC KA	Aligned	Off	sets	Num	Num	Tot	MisM
#	Names	Pvalue	Pvalue	Begin	End	Len	Poly	Dif	Difs	Pen.	Average length		Median length
GI	ESP8;Esp28	0.0001	0.0001	9054	9117	64	61	0	140	None	27.1667		16
GI	Esp21;rEsp3	0.0004	0.00085	9250	9319	70	43	0	172	None
GI	Esp28;rEsp3	0.0005	0.00121	9279	9319	41	34	0	205	None
GI	ESP31;ESP5	0.0006	0.00151	9361	9388	28	23	0	271	None
GI	Esp22;ESP6	0.0028	0.00749	8356	8370	15	15	0	334	None
GI	ESP24;ESP5	0.0044	0.01499	9359	9379	21	21	0	263	None
GI	ESP38;Esp20	0.0125	0.04399	8269	8284	16	13	0	340	None
GI	ESP18;Esp20	0.0249	0.08263	8269	8284	16	13	0	332	None
GI	rEsp5;ESP1	0.0298	0.10379	8333	8346	14	13	0	329	None
GI	rEsp6;ESP1	0.0298	0.10379	8333	8346	14	13	0	329	None
GI	Esp22;Esp9	0.0342	0.12091	8359	8370	12	12	0	342	None
GI	ESP31;Esp20	0.0375	0.13036	8269	8283	15	12	0	341	None
gscale = 1
#	Names	Pvalue	Pvalue	Begin	End	Len	Poly	Dif	Difs	Pen.	Average length		Median length
GI	Esp21;Esp28	0	0	8269	9374	1106	339	25	123	5	825.833		144
GI	ESP8;Esp28	0	0	8269	9374	1106	339	37	140	4
GI	Esp28;rEsp3	0	0	9062	9374	313	190	29	205	3
GI	Esp21;rEsp3	0	0	9062	9447	386	231	31	172	3
GI	rEsp5;Esp9	0	0	8336	8369	34	34	4	352	2
GI	rEsp6;Esp9	0	0	8336	8369	34	34	4	352	2
GI	rEsp9;ESP24	0	3e-05	9313	9522	210	109	25	272	2
GI	rEsp5;ESP3	0	9e-05	8335	8369	35	35	5	336	2
GI	rEsp6;ESP3	0	9e-05	8335	8369	35	35	5	336	2
GI	rEsp9;Esp30	0	0.00039	9364	9522	159	88	20	280	2
GI	rEsp9;Esp26	0.0001	0.00053	9313	9522	210	109	27	278	2
GI	rEsp9;Esp27	0.0001	0.00064	9401	9519	119	57	9	269	2
GI	ESP36;Esp9	0.0001	0.00088	8336	8370	35	35	6	343	2
GI	ESP3;Esp9	0.0003	0.00188	8336	8371	36	36	3	274	2
GI	ESP16;Esp9	0.0004	0.00256	8351	8370	20	20	1	334	2
GI	ESP24;ESP5	0.0004	0.00303	9355	9483	129	68	13	263	2
GI	ESP8;Esp21	0.0005	0.00353	8269	9407	1139	363	42	112	5
GI	rEsp5;rEsp6	0.0035	0.00377	1	9759	9759	494	0	1	495
